# Supplementary material
Source: HighWire-hosted journal article supplement (https://jnm.snmjournals.org/highwire/filestream/93947/field_highwire_adjunct_files/0/49833_Supp_Fig_1.pdf)
Supplement: 49833_Supp_Fig_1.pdf [file 49833_Supp_Fig_1.pdf]

FPLC profiles of Herceptin, m-MeATE-Herceptin, and  $^{211}\text{At}$ -Herceptin

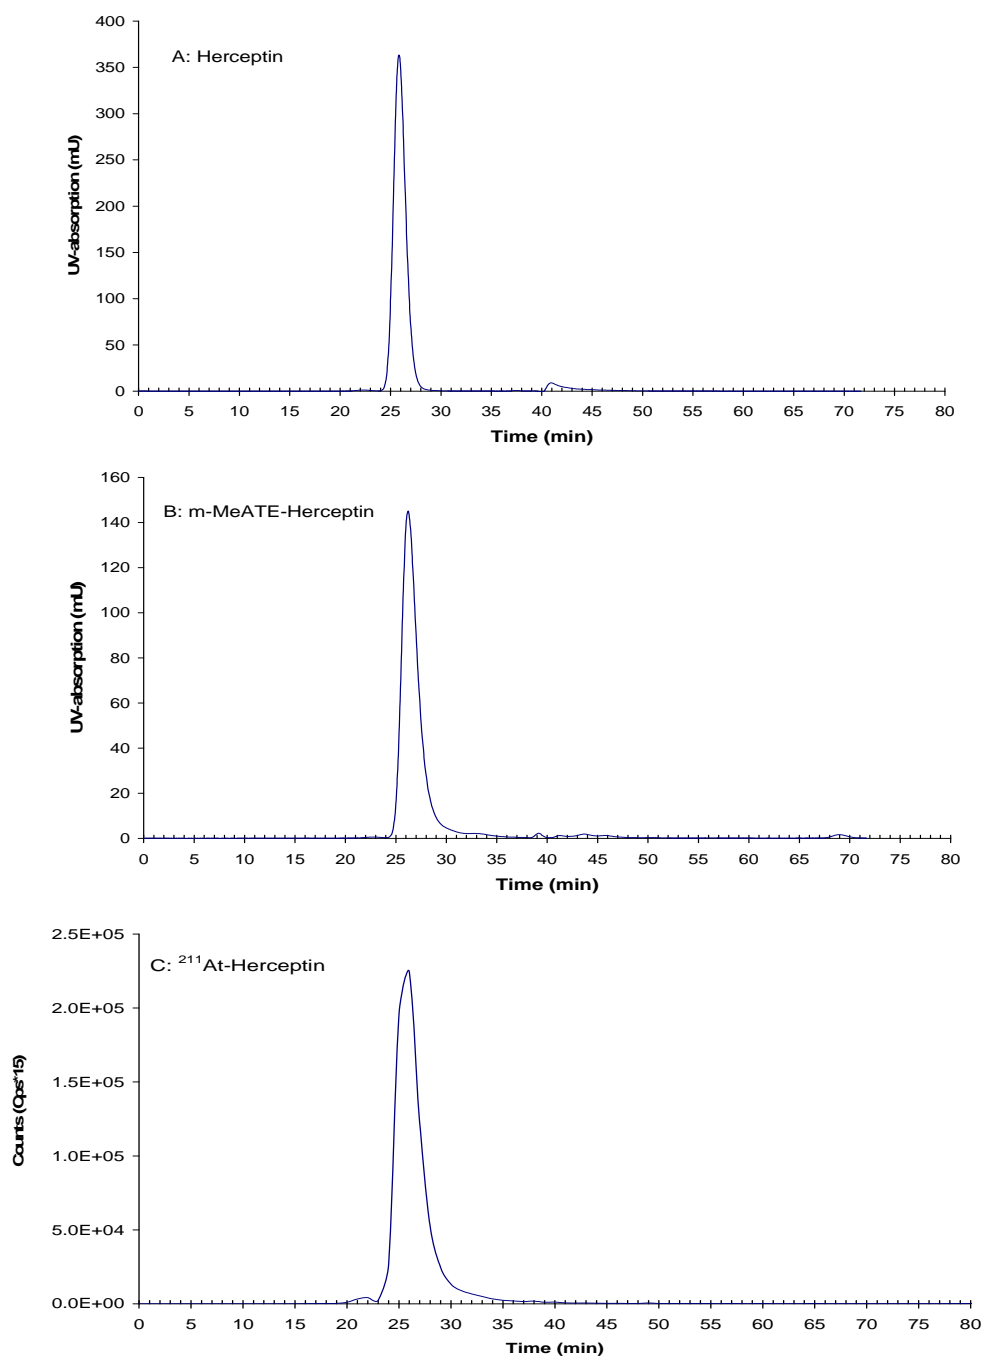

**Figure 1.** Size-exclusion FPLC chromatograms of Herceptin (A), and conjugates prepared for the study, m-MeATE-Herceptin (B) and  $^{211}\text{At}$ -Herceptin (C).  
Column: Superdex 200  
Mobile phase: PBS  
Flow: 0.5 mL/min
